# Supplementary material
Source: publisher figshare collection journal article supplement (https://gsapubs.figshare.com/articles/dataset/_/12536501)
Supplement: Supplementary file 1 [file 1]

GSA Data Repository 2018159

Almqvist and Koyi, 2018, Bulk strain in orogenic wedges based on insights from magnetic fabrics in sandbox models: *Geology*, <https://doi.org/10.1130/G39998.1>.

## Data Sets

2018159\_AMS Analysis.xlsx

2018159\_Strain Marker Analysis.xlsx

## Supplementary Figures

(a) Model 1, 8 % shortening (5 cm)

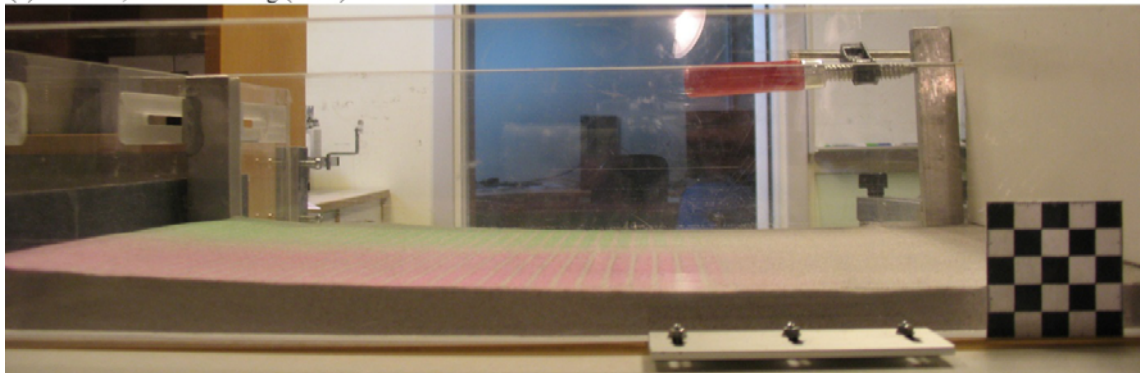

(b) Model 4, 33 % shortening (20 cm)

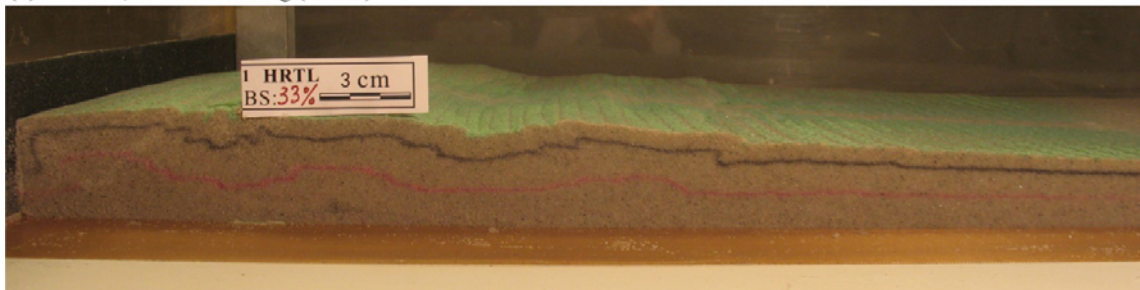

Figure DR1. Cross-sections of model 1 (8% shortening) and model 4 (33 % shortening). Each square in (a) represents 1 cm.

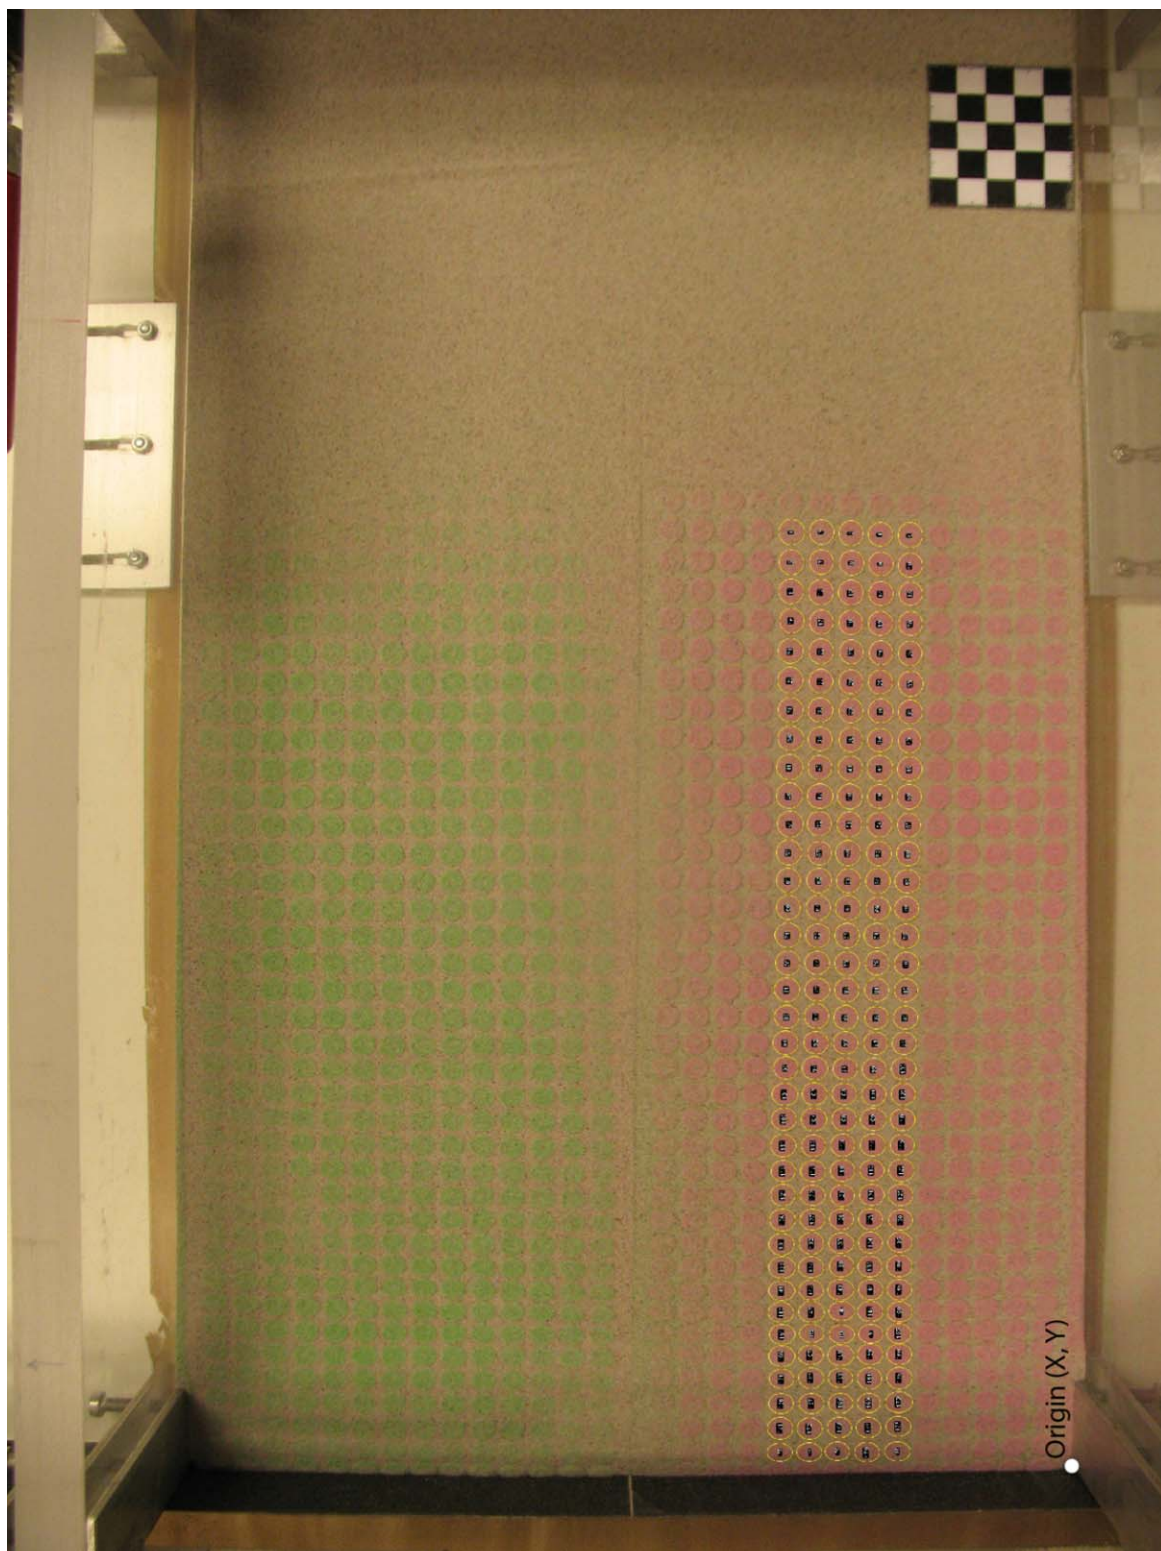

Figure DR2. Model 1 strain ellipses.



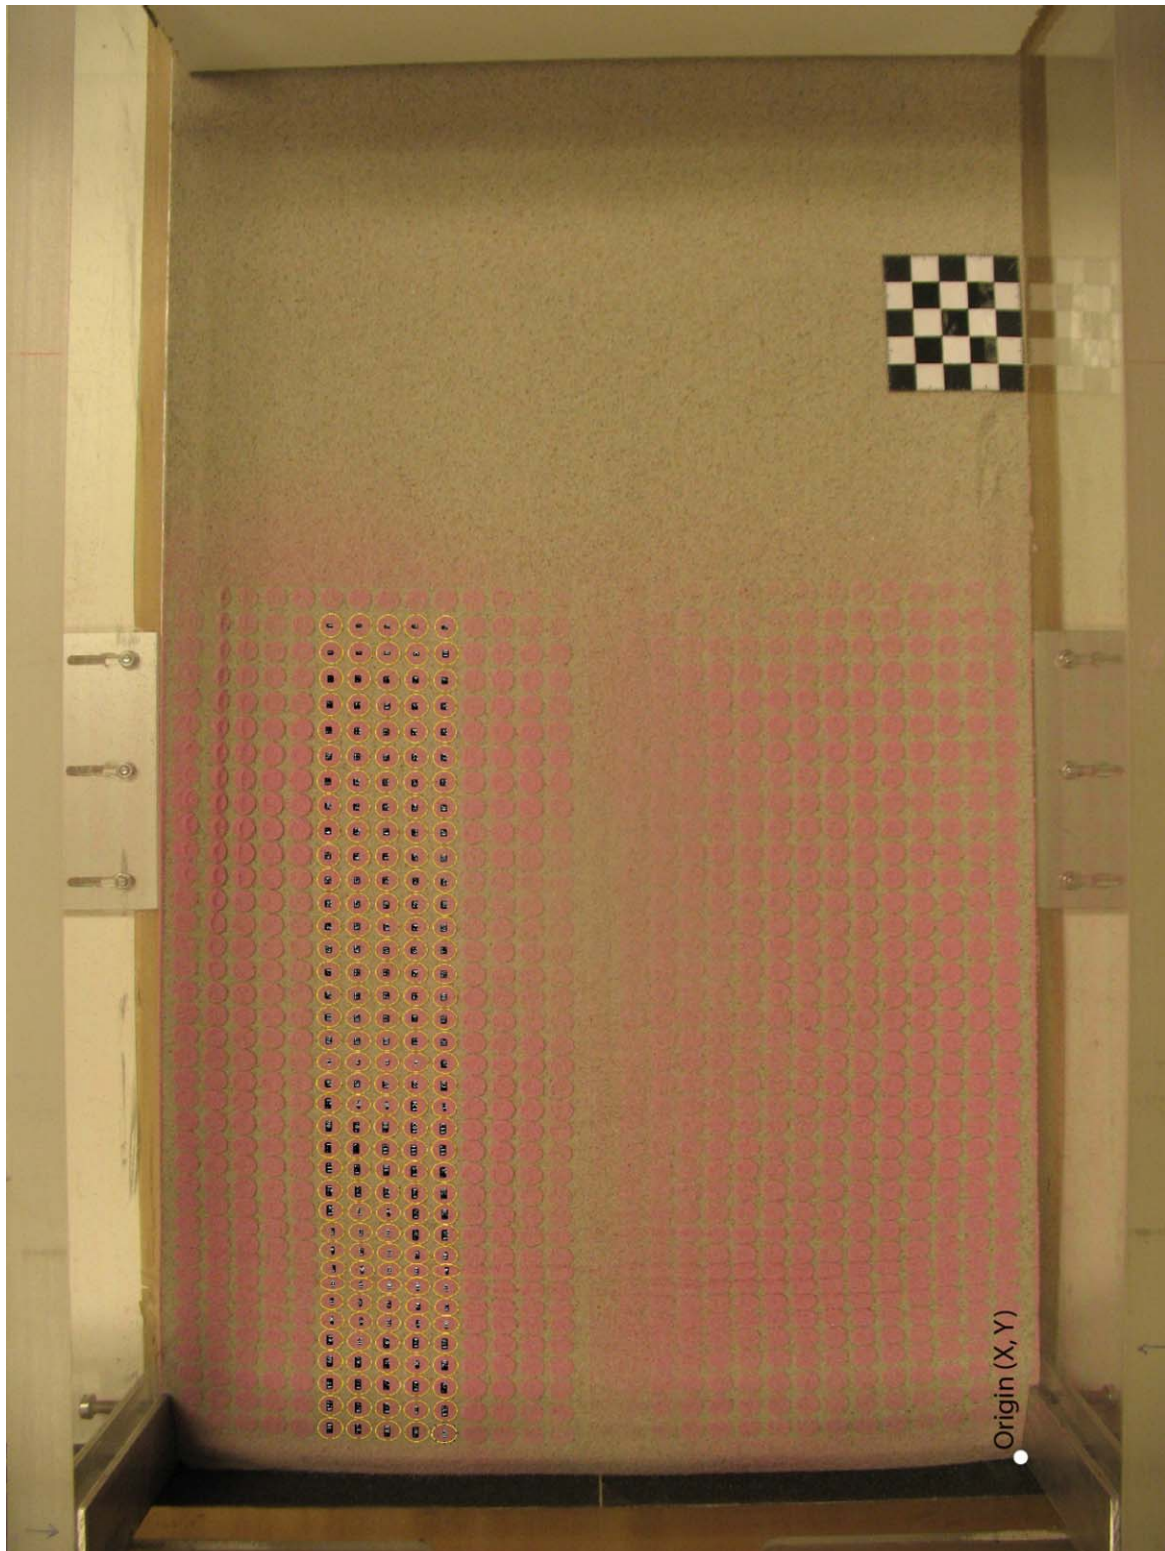

Figure DR3. Model 2 strain ellipses.

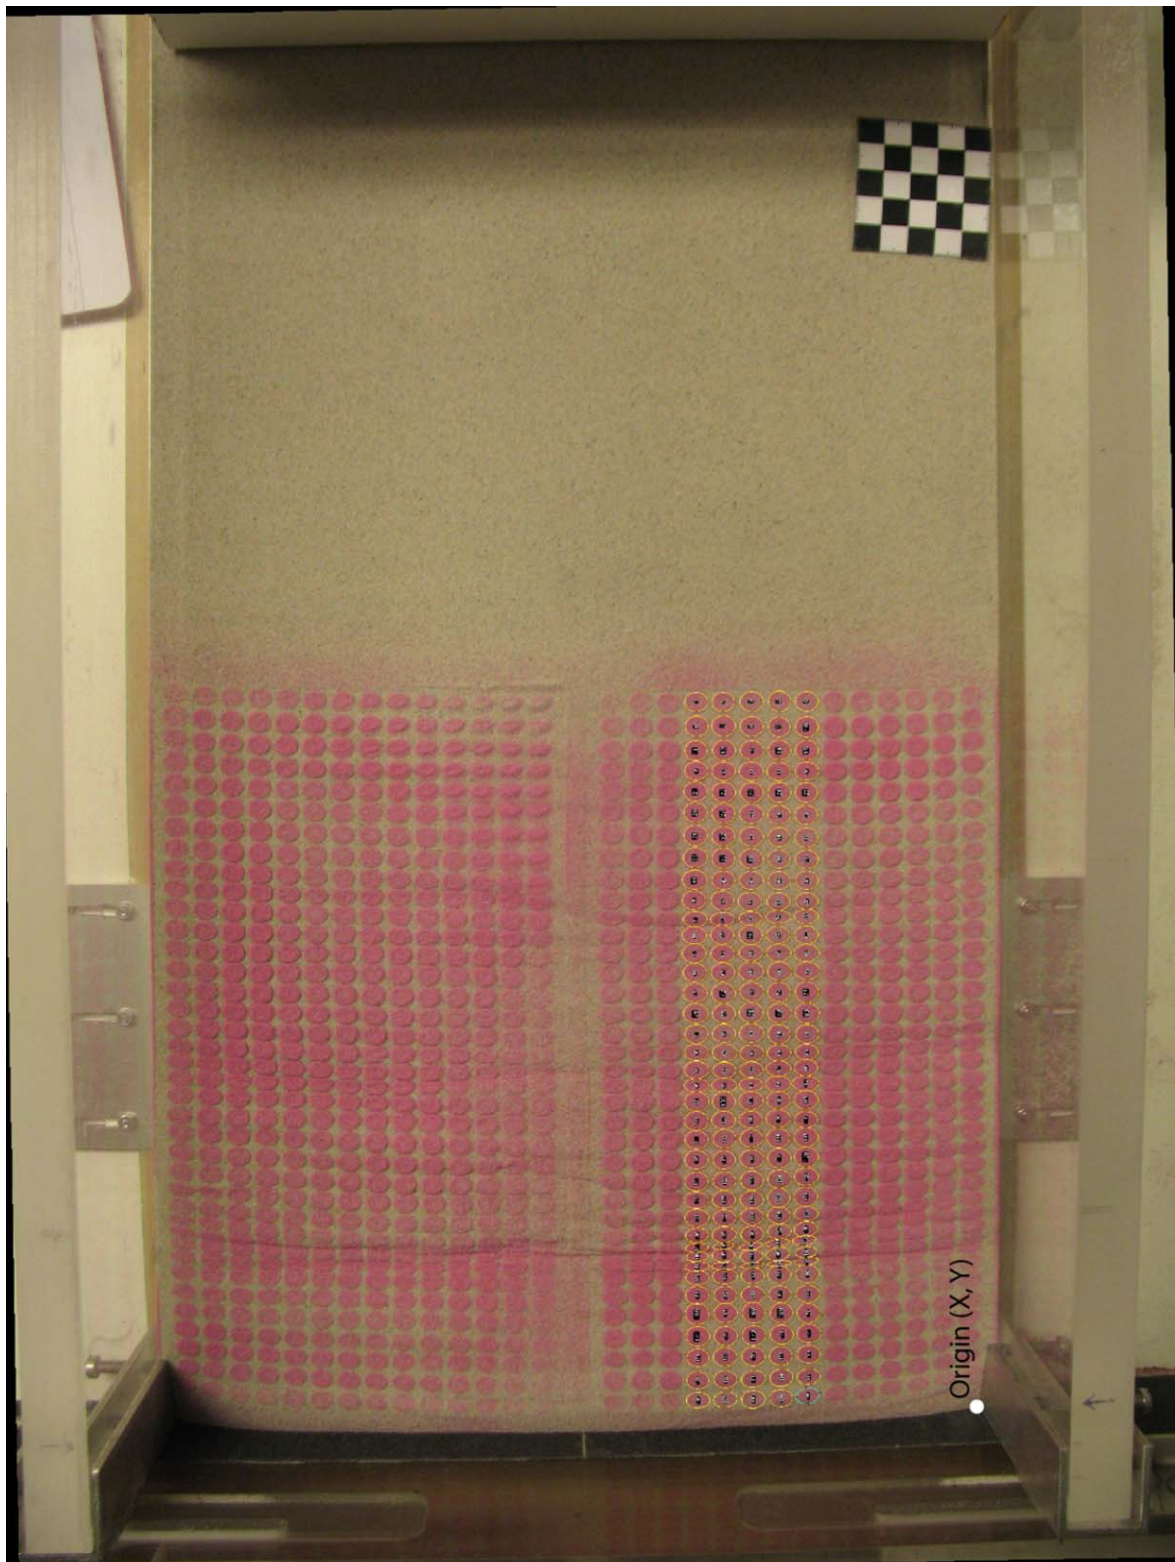

Figure DR4. Model 3 strain ellipses.



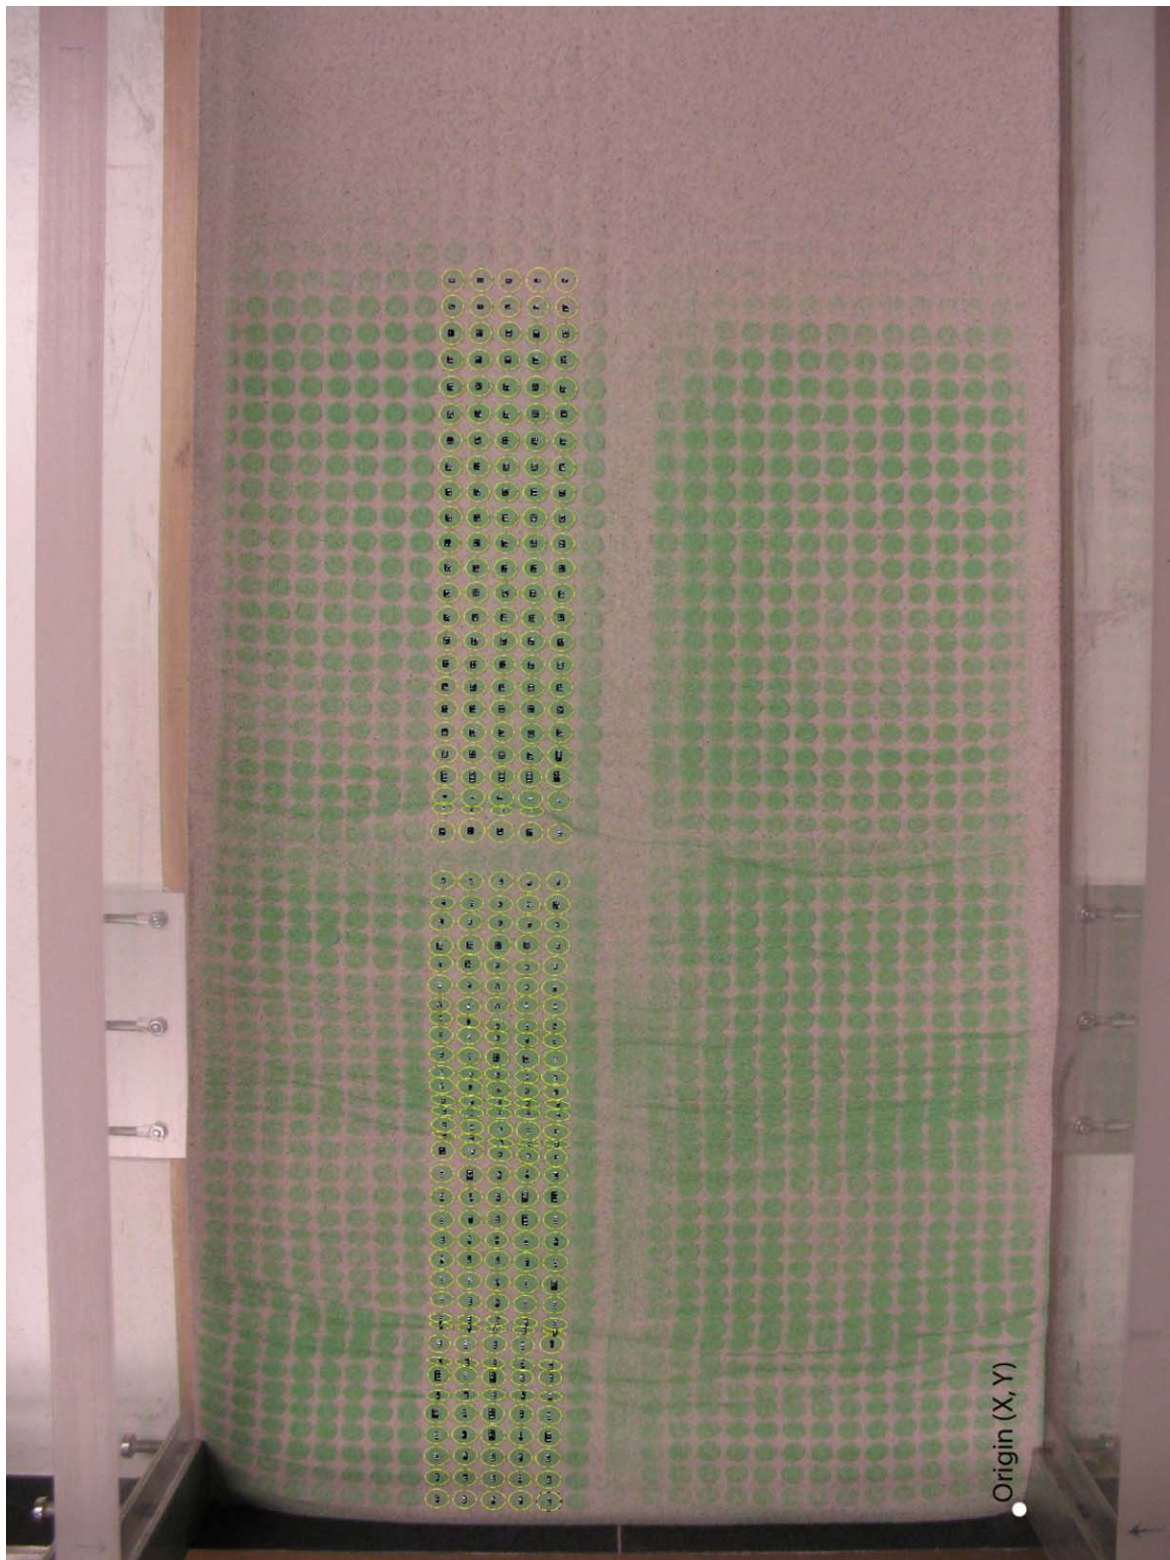

Figure DR5. Model 4 strain ellipses.
